# Supplementary material for: Functional Characterization of the Solute Carrier LAT-1 (SLC7A5/SLC3A2) in Human Brain Capillary Endothelial Cells with Rapid UPLC-MS/MS Quantification of Intracellular Isotopically Labelled L-Leucine
Source: MDPI journal article supplement (doi:10.3390/ijms23073637), 2022-03-26
Supplement: s1 [file s1]

**Functional characterization of the solute carrier LAT-1 (SLC7A5/SLC2A3) in human brain capillary endothelial cells with rapid UPLC-MS/MS quantification of intracellular isotopically labelled L-leucine**

Cindy Bay<sup>1</sup>, Gzona Bajraktari-Sylejmani<sup>1</sup>, Walter E. Haefeli, Jürgen Burhenne, Johanna Weiss, Max Sauter\*

Department of Clinical Pharmacology and Pharmacoepidemiology, Heidelberg University Hospital, Im Neuenheimer Feld 410, 69120, Heidelberg, Germany

<sup>1</sup>These authors contributed equally to this work.

\*Correspondence: [max.sauter@med.uni-heidelberg.de](mailto:max.sauter@med.uni-heidelberg.de)

**Supplementary material**

Table S1: Calibration curves of the validation batches, calculated with linear regression and  $1/x^2$  weighting.

| Validation batch | R <sup>2</sup> | Equation                  |
|------------------|----------------|---------------------------|
| #1               | 0.9980         | $y = 0.01740 x + 0.00011$ |
| #2               | 0.9948         | $y = 0.01765 x + 0.00021$ |
| #3               | 0.9956         | $y = 0.01630 x + 0.00037$ |

Table S2: Accuracy and precision data for the 24 h autosampler stability determination.

| QC level | Accuracy [%] | Precision [% CV] |
|----------|--------------|------------------|
| Low QC   | 100.3        | 7.87             |
| Mid QC   | 107.0        | 1.02             |
| High QC  | 98.8         | 8.94             |

N = 3 replicates at each QC concentration.

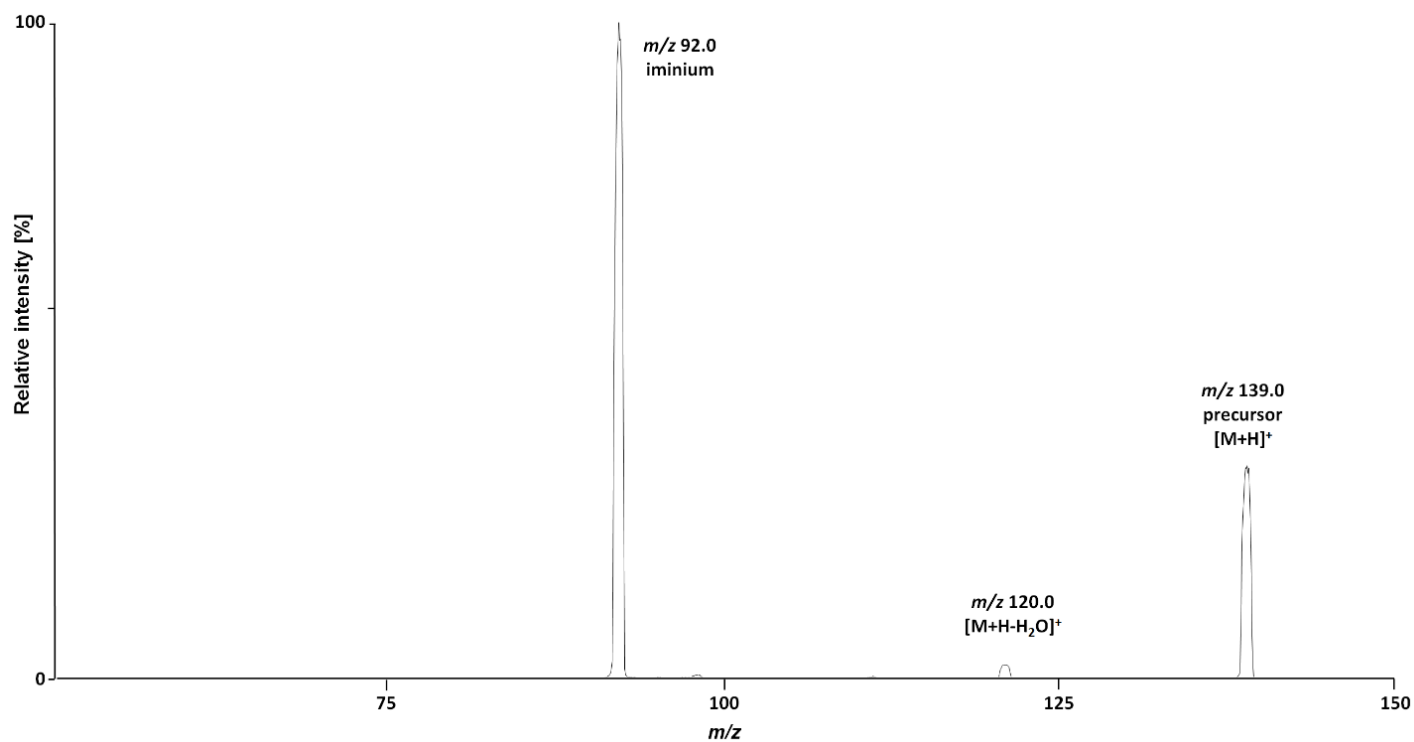

**Figure S1.** Product ion spectrum of [<sup>13</sup>C<sub>6</sub>, <sup>15</sup>N]-L-leucine at the optimal collision energy of 16 V for the second observed product ion at *m/z* 120.0. However, the iminium ion fragment is still substantially more intense, demonstrating its superior sensitivity for selected reaction monitoring.

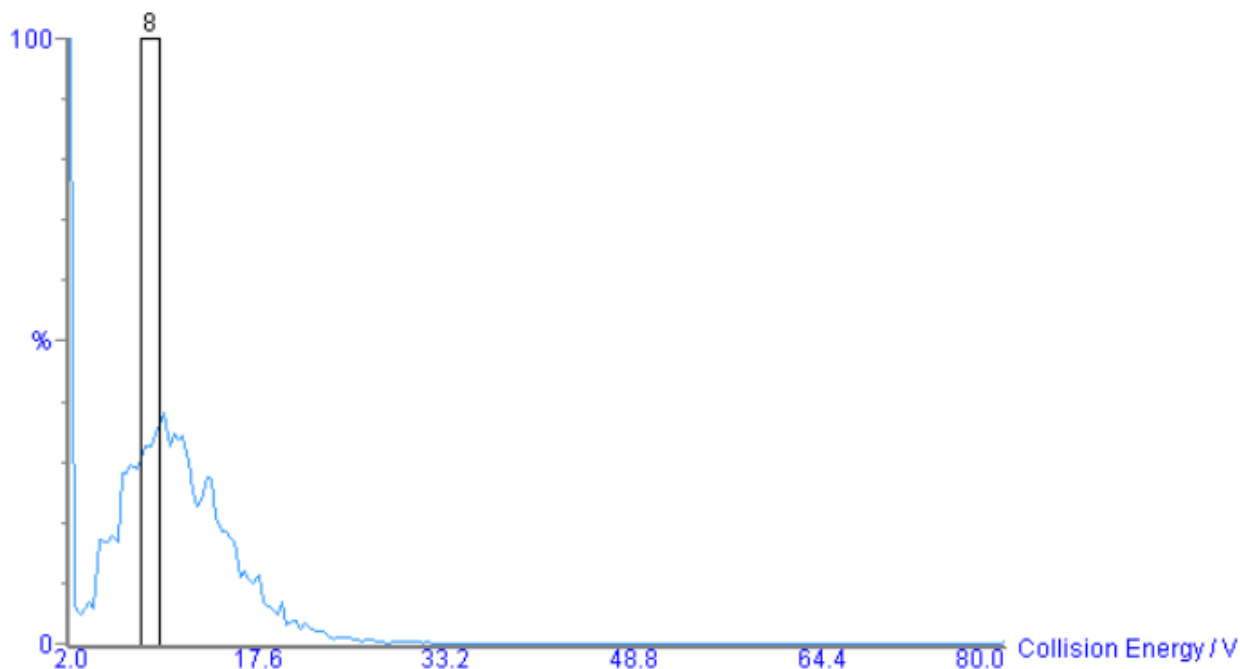

**Figure S2.** Optimization of the collision energy for the monitoring of the product iminium ion. The highest intensity for the corresponding transition of  $m/z$  139.0  $\rightarrow$  92.0 was achieved at a collision energy of 9 V.

Compound name: LLC-7  
 Correlation coefficient:  $r = 0.997810$ ,  $r^2 = 0.995624$   
 Calibration curve:  $0.0163008 \cdot x + 0.000365483$   
 Response type: Internal Std ( Ref 2 ), Area \* ( IS Conc. / IS Area )  
 Curve type: Linear, Origin: Exclude, Weighting:  $1/x^2$ , Axis trans: None

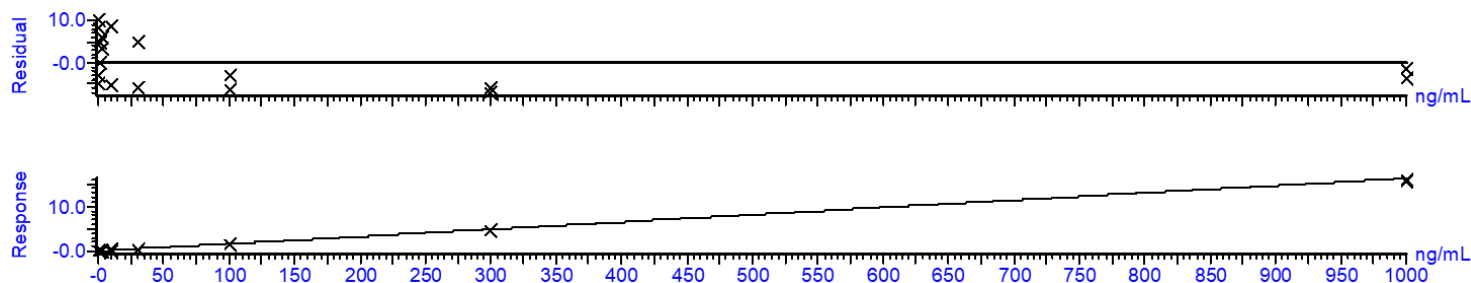

**Figure S3.** Exemplary calibration curve with residuals of validation batch #3.
